# Supplementary material for: Maternal Age at Menarche Genes Determines Fetal Growth Restriction Risk
Source: MDPI journal article supplement (doi:10.3390/ijms25052647), 2024-02-24
Supplement: s1 [file s1]

**Supplementary Table S10.** Association of FGR-associated mAMM-involved SNPs with several maternal/offspring phenotypes in the studied population.

| Chr<br>(1) | SNP<br>(2) | Gene<br>(3)    | FGR<br>(4) | Maternal/offspring phenotypes |             |                       |                             |                                    |                            |
|------------|------------|----------------|------------|-------------------------------|-------------|-----------------------|-----------------------------|------------------------------------|----------------------------|
|            |            |                |            | biological                    |             |                       | disorder                    |                                    |                            |
|            |            |                |            | age at<br>menarche*<br>(5)    | BMI*<br>(6) | offspring BW<br>(7)** | uterine leiomyoma<br>(8)*** | endometrial<br>hyperplasia (9)**** | endometriosis<br>(10)***** |
| 1          | rs1514175  | <i>TNNI3K</i>  |            |                               |             | yes                   | yes                         |                                    | yes                        |
| 1          | rs466639   | <i>RXRG</i>    |            |                               |             |                       |                             |                                    |                            |
| 1          | rs7538038  | <i>KISS1</i>   | yes        |                               |             | yes                   |                             | yes                                |                            |
| 2          | rs713586   | <i>RBJ</i>     | yes        |                               |             | yes                   | yes                         |                                    | yes                        |
| 2          | rs2164808  | <i>POMC</i>    |            | yes                           | yes         |                       |                             |                                    |                            |
| 2          | rs7589318  | <i>POMC</i>    |            |                               |             | yes                   | yes                         |                                    |                            |
| 2          | rs4374421  | <i>LHCGR</i>   |            | yes                           | yes         | yes                   | yes                         | yes                                | yes                        |
| 2          | rs7579411  | <i>LHCGR</i>   | yes        | yes                           |             |                       | yes                         |                                    | yes                        |
| 2          | rs4953616  | <i>LHCGR</i>   |            |                               | yes         |                       | yes                         |                                    |                            |
| 2          | rs6732220  | <i>FSHR</i>    |            |                               |             |                       |                             | yes                                |                            |
| 2          | rs4953655  | <i>FSHR</i>    |            |                               | yes         |                       | yes                         | yes                                |                            |
| 2          | rs12617311 | <i>PLCL1</i>   |            | yes                           | yes         |                       |                             |                                    |                            |
| 3          | rs6438424  | <i>3q13.32</i> |            | yes                           |             |                       |                             | yes                                | yes                        |
| 4          | rs2013573  | <i>UGT2B4</i>  |            |                               |             | yes                   | yes                         | yes                                |                            |
| 4          | rs13111134 | <i>UGT2B4</i>  | yes        |                               |             |                       |                             | yes                                |                            |
| 4          | rs222003   | <i>GC</i>      | yes        |                               |             | yes                   |                             |                                    |                            |
| 4          | rs222020   | <i>GC</i>      |            |                               |             |                       | yes                         |                                    |                            |
| 4          | rs3756261  | <i>EGF</i>     |            |                               |             |                       |                             |                                    |                            |
| 5          | rs757647   | <i>KDM3B</i>   |            |                               |             | yes                   |                             |                                    |                            |
| 6          | rs7766109  | <i>F13A1</i>   |            |                               |             |                       |                             | yes                                |                            |
| 6          | rs4946651  | <i>LIN28B</i>  |            | yes                           | yes         | yes                   | yes                         |                                    |                            |
| 6          | rs7759938  | <i>LIN28B</i>  |            | yes                           |             |                       |                             | yes                                | yes                        |
| 6          | rs314280   | <i>LIN28B</i>  | yes        |                               | yes         | yes                   |                             |                                    |                            |

|    |            |               |     |     |     |     |     |     |     |
|----|------------|---------------|-----|-----|-----|-----|-----|-----|-----|
| 6  | rs314276   | <i>LIN28B</i> |     | yes |     |     | yes | yes |     |
| 6  | rs3020394  | <i>ESR1</i>   | yes |     | yes | yes |     |     |     |
| 6  | rs1884051  | <i>ESR1</i>   |     |     |     |     |     |     |     |
| 6  | rs7753051  | <i>IGF2R</i>  |     |     |     |     | yes |     |     |
| 7  | rs1079866  | <i>INHBA</i>  |     |     |     | yes |     |     |     |
| 8  | rs2288696  | <i>FGFR1</i>  |     |     |     |     |     |     |     |
| 9  | rs10980926 | <i>ZNF483</i> |     |     |     |     | yes | yes | yes |
| 9  | rs10441737 | <i>ZNF483</i> |     |     |     | yes |     | yes | yes |
| 11 | rs10769908 | <i>STK33</i>  | yes | yes |     |     | yes |     |     |
| 11 | rs555621   | <i>FSHB</i>   | yes |     | yes | yes | yes | yes | yes |
| 11 | rs11031010 | <i>FSHB</i>   | yes |     |     |     | yes | yes | yes |
| 11 | rs1782507  | <i>FSHB</i>   | yes |     |     | yes | yes | yes | yes |
| 11 | rs6589964  | <i>BSX</i>    |     | yes |     | yes |     | yes | yes |
| 12 | rs1544410  | <i>VDR</i>    | yes |     | yes |     | yes |     | yes |
| 14 | rs999460   | <i>NKX2-1</i> | yes |     | yes | yes |     | yes |     |
| 14 | rs4986938  | <i>ESR2</i>   |     |     |     | yes |     | yes |     |
| 15 | rs2241423  | <i>MAP2K5</i> |     |     |     |     | yes |     |     |
| 16 | rs12444979 | <i>GPRC5B</i> | yes |     |     | yes |     |     |     |
| 16 | rs9939609  | <i>FTO</i>    |     |     |     |     |     |     |     |
| 16 | rs12324955 | <i>FTO</i>    |     |     |     | yes | yes | yes | yes |
| 18 | rs1398217  | <i>SKOR2</i>  | yes |     | yes |     |     |     |     |
| 19 | rs2252673  | <i>INSR</i>   |     | yes |     |     |     |     |     |
| 20 | rs1073768  | <i>GHRH</i>   |     | yes | yes | yes |     |     | yes |
| 22 | rs4633     | <i>COMT</i>   |     | yes | yes | yes | yes | yes |     |
| 23 | rs5930973  | <i>CD40LG</i> |     |     |     |     |     |     |     |
| 23 | rs3092921  | <i>CD40LG</i> |     |     |     |     |     |     |     |

Note: **yes**: associated.

\* Ponomarenko et al., 2019 [36];\*\* Reshetnikova et al., 2023 [40];\*\*\* Ponomarenko et al., 2021 [33];\*\*\*\* Ponomarenko et al., 2020 [31];\*\*\*\*\* Ponomarenko et al., 2020 [32]
