# Supplementary material for: Maternal Age at Menarche Genes Determines Fetal Growth Restriction Risk
Source: MDPI journal article supplement (doi:10.3390/ijms25052647), 2024-02-24
Supplement: s1 [file s1]

Supplementary Table S1. Distribution of alleles and genotypes frequencies of 49 SNPs in the study group.

| Minore allele<br>(SNP) | Gene          | Chr | Genotypes<br>(A <sub>1</sub> A <sub>1</sub> /A <sub>1</sub> A <sub>2</sub> /A <sub>2</sub> A <sub>2</sub> ) | Minor<br>allele<br>frequency | H <sub>o</sub> | H <sub>e</sub> | P     |
|------------------------|---------------|-----|-------------------------------------------------------------------------------------------------------------|------------------------------|----------------|----------------|-------|
| FGR (n=273)            |               |     |                                                                                                             |                              |                |                |       |
| T (rs1514175)          | <i>TNNI3K</i> | 1   | 48/121/102                                                                                                  | 0.400                        | 0.447          | 0.480          | 0.256 |
| T (rs466639)           | <i>RXRG</i>   | 1   | 4/54/214                                                                                                    | 0.114                        | 0.199          | 0.202          | 0.762 |
| G (rs7538038)          | <i>KISS1</i>  | 1   | 9/75/188                                                                                                    | 0.171                        | 0.276          | 0.284          | 0.668 |
| C (rs713586)           | <i>RBJ</i>    | 2   | 59/121/91                                                                                                   | 0.441                        | 0.447          | 0.493          | 0.139 |
| A (rs2164808)          | <i>POMC</i>   | 2   | 59/141/73                                                                                                   | 0.474                        | 0.517          | 0.499          | 0.628 |
| A (rs7589318)          | <i>POMC</i>   | 2   | 20/122/131                                                                                                  | 0.297                        | 0.447          | 0.417          | 0.310 |
| C (rs4374421)          | <i>LHCGR</i>  | 2   | 18/127/125                                                                                                  | 0.302                        | 0.470          | 0.422          | 0.062 |
| T (rs7579411)          | <i>LHCGR</i>  | 2   | 49/136/86                                                                                                   | 0.432                        | 0.502          | 0.491          | 0.804 |
| C (rs4953616)          | <i>LHCGR</i>  | 2   | 19/115/138                                                                                                  | 0.281                        | 0.423          | 0.404          | 0.549 |
| G (rs6732220)          | <i>FSHR</i>   | 2   | 12/108/152                                                                                                  | 0.243                        | 0.397          | 0.368          | 0.247 |
| G (rs4953655)          | <i>FSHR</i>   | 2   | 11/100/162                                                                                                  | 0.223                        | 0.366          | 0.347          | 0.484 |
| A (rs12617311)         | <i>PLCL1</i>  | 2   | 30/115/124                                                                                                  | 0.325                        | 0.428          | 0.439          | 0.678 |
| C (rs6438424)          | <i>IGSF11</i> | 3   | 61/133/78                                                                                                   | 0.469                        | 0.489          | 0.498          | 0.808 |
| A (rs2013573)          | <i>UGT2B4</i> | 4   | 7/90/176                                                                                                    | 0.191                        | 0.330          | 0.308          | 0.327 |
| A (rs13111134)         | <i>UGT2B4</i> | 4   | 8/111/153                                                                                                   | 0.234                        | 0.408          | 0.358          | 0.027 |
| C (rs222003)           | <i>GC</i>     | 4   | 1/35/237                                                                                                    | 0.068                        | 0.128          | 0.126          | 1.000 |
| C (rs222020)           | <i>GC</i>     | 4   | 2/58/212                                                                                                    | 0.114                        | 0.213          | 0.202          | 0.549 |
| G (rs3756261)          | <i>EGF</i>    | 4   | 1/39/232                                                                                                    | 0.075                        | 0.143          | 0.139          | 1.000 |
| T (rs757647)           | <i>KDM3B</i>  | 5   | 7/115/147                                                                                                   | 0.240                        | 0.428          | 0.365          | 0.004 |
| G (rs7766109)          | <i>F13A1</i>  | 6   | 71/135/67                                                                                                   | 0.507                        | 0.495          | 0.500          | 0.904 |
| A (rs4946651)          | <i>LIN28B</i> | 6   | 45/133/94                                                                                                   | 0.410                        | 0.489          | 0.484          | 0.901 |
| C (rs7759938)          | <i>LIN28B</i> | 6   | 22/112/137                                                                                                  | 0.288                        | 0.413          | 0.410          | 1.000 |
| T (rs314280)           | <i>LIN28B</i> | 6   | 40/133/95                                                                                                   | 0.397                        | 0.496          | 0.479          | 0.611 |
| A (rs314276)           | <i>LIN28B</i> | 6   | 25/112/131                                                                                                  | 0.302                        | 0.418          | 0.422          | 0.885 |
| G (3020394)            | <i>ESR1</i>   | 6   | 38/109/126                                                                                                  | 0.339                        | 0.399          | 0.448          | 0.079 |
| G (1884051)            | <i>ESR1</i>   | 6   | 35/112/126                                                                                                  | 0.333                        | 0.410          | 0.444          | 0.220 |
| C (rs7753051)          | <i>IGF2R</i>  | 6   | 20/127/125                                                                                                  | 0.307                        | 0.467          | 0.426          | 0.120 |
| C (rs1079866)          | <i>INHBA</i>  | 7   | 5/81/187                                                                                                    | 0.167                        | 0.297          | 0.278          | 0.381 |
| T (rs2288696)          | <i>FGFR1</i>  | 8   | 7/98/168                                                                                                    | 0.205                        | 0.359          | 0.326          | 0.136 |
| C (rs10980926)         | <i>ZNF483</i> | 9   | 25/106/142                                                                                                  | 0.286                        | 0.388          | 0.408          | 0.458 |
| C (rs10441737)         | <i>ZNF483</i> | 9   | 24/105/141                                                                                                  | 0.283                        | 0.389          | 0.406          | 0.458 |
| C (rs10769908)         | <i>STK33</i>  | 11  | 57/148/63                                                                                                   | 0.489                        | 0.552          | 0.500          | 0.112 |
| G (rs555621)           | <i>FSHB</i>   | 11  | 48/142/81                                                                                                   | 0.439                        | 0.524          | 0.493          | 0.325 |
| A (rs11031010)         | <i>FSHB</i>   | 11  | 4/63/204                                                                                                    | 0.131                        | 0.233          | 0.228          | 1.000 |
| C (rs1782507)          | <i>FSHB</i>   | 11  | 39/122/112                                                                                                  | 0.366                        | 0.447          | 0.464          | 0.517 |
| A (rs6589964)          | <i>BSX</i>    | 11  | 51/142/80                                                                                                   | 0.447                        | 0.520          | 0.494          | 0.462 |
| A (rs1544410)          | <i>VDR</i>    | 12  | 40/138/94                                                                                                   | 0.401                        | 0.507          | 0.480          | 0.380 |
| A (rs999460)           | <i>NKX2-1</i> | 14  | 45/121/106                                                                                                  | 0.388                        | 0.445          | 0.475          | 0.308 |
| A (rs4986938)          | <i>ESR2</i>   | 14  | 33/121/118                                                                                                  | 0.344                        | 0.445          | 0.451          | 0.790 |
| A (rs2241423)          | <i>MAP2K5</i> | 15  | 8/86/177                                                                                                    | 0.188                        | 0.317          | 0.306          | 0.691 |
| T (rs12444979)         | <i>GPRC5B</i> | 16  | 11/78/183                                                                                                   | 0.184                        | 0.287          | 0.300          | 0.425 |
| A (rs9939609)          | <i>FTO</i>    | 16  | 54/133/86                                                                                                   | 0.441                        | 0.487          | 0.493          | 0.902 |
| A (rs12324955)         | <i>FTO</i>    | 16  | 20/113/139                                                                                                  | 0.281                        | 0.415          | 0.404          | 0.764 |
| G (rs1398217)          | <i>SKOR2</i>  | 18  | 40/136/95                                                                                                   | 0.399                        | 0.502          | 0.479          | 0.526 |
| G (rs2252673)          | <i>INSR</i>   | 19  | 6/101/164                                                                                                   | 0.209                        | 0.373          | 0.330          | 0.042 |
| A (rs1073768)          | <i>GHRH</i>   | 20  | 61/140/70                                                                                                   | 0.483                        | 0.517          | 0.499          | 0.627 |
| C (rs4633)             | <i>COMT</i>   | 22  | 64/133/75                                                                                                   | 0.480                        | 0.489          | 0.499          | 0.717 |
| A (rs5930973)          | <i>CD40LG</i> | 23  | 4/28/236                                                                                                    | 0.067                        | 0.105          | 0.125          | 0.022 |
| T (rs3092921)          | <i>CD40LG</i> | 23  | 2/43/228                                                                                                    | 0.086                        | 0.158          | 0.157          | 1.000 |
| Control group (n=631)  |               |     |                                                                                                             |                              |                |                |       |
| T (rs1514175)          | <i>TNNI3K</i> | 1   | 100/277/248                                                                                                 | 0.382                        | 0.443          | 0.472          | 0.128 |
| T (rs466639)           | <i>RXRG</i>   | 1   | 16/124/487                                                                                                  | 0.124                        | 0.198          | 0.218          | 0.027 |
| G (rs7538038)          | <i>KISS1</i>  | 1   | 31/247/348                                                                                                  | 0.247                        | 0.395          | 0.372          | 0.134 |
| C (rs713586)           | <i>RBJ</i>    | 2   | 135/293/200                                                                                                 | 0.448                        | 0.467          | 0.495          | 0.170 |

|                |               |    |             |       |       |       |       |
|----------------|---------------|----|-------------|-------|-------|-------|-------|
| A (rs2164808)  | <i>POMC</i>   | 2  | 129/307/189 | 0.452 | 0.491 | 0.495 | 0.872 |
| A (rs7589318)  | <i>POMC</i>   | 2  | 68/241/318  | 0.301 | 0.384 | 0.421 | 0.036 |
| C (rs4374421)  | <i>LHCGR</i>  | 2  | 65/254/285  | 0.318 | 0.421 | 0.434 | 0.454 |
| T (rs7579411)  | <i>LHCGR</i>  | 2  | 118/329/173 | 0.456 | 0.531 | 0.496 | 0.090 |
| C (rs4953616)  | <i>LHCGR</i>  | 2  | 48/264/308  | 0.290 | 0.426 | 0.412 | 0.437 |
| G (rs6732220)  | <i>FSHR</i>   | 2  | 42/237/347  | 0.256 | 0.379 | 0.381 | 0.835 |
| G (rs4953655)  | <i>FSHR</i>   | 2  | 39/233/353  | 0.249 | 0.373 | 0.374 | 0.915 |
| A (rs12617311) | <i>PLCL1</i>  | 2  | 72/265/289  | 0.327 | 0.423 | 0.440 | 0.364 |
| C (rs6438424)  | <i>IGSF11</i> | 3  | 149/294/173 | 0.481 | 0.477 | 0.499 | 0.294 |
| A (rs2013573)  | <i>UGT2B4</i> | 4  | 10/181/435  | 0.161 | 0.289 | 0.270 | 0.076 |
| A (rs13111134) | <i>UGT2B4</i> | 4  | 15/211/398  | 0.193 | 0.338 | 0.312 | 0.039 |
| C (rs222003)   | <i>GC</i>     | 4  | 2/67/558    | 0.057 | 0.107 | 0.107 | 1.000 |
| C (rs222020)   | <i>GC</i>     | 4  | 5/138/484   | 0.118 | 0.220 | 0.208 | 0.182 |
| G (rs3756261)  | <i>EGF</i>    | 4  | 2/90/534    | 0.075 | 0.144 | 0.139 | 0.566 |
| T (rs757647)   | <i>KDM3B</i>  | 5  | 33/245/342  | 0.251 | 0.395 | 0.376 | 0.239 |
| G (rs7766109)  | <i>F13A1</i>  | 6  | 140/307/178 | 0.470 | 0.491 | 0.498 | 0.748 |
| A (rs4946651)  | <i>LIN28B</i> | 6  | 106/304/218 | 0.411 | 0.484 | 0.484 | 1.000 |
| C (rs7759938)  | <i>LIN28B</i> | 6  | 54/243/331  | 0.280 | 0.387 | 0.403 | 0.323 |
| T (rs314280)   | <i>LIN28B</i> | 6  | 95/306/219  | 0.400 | 0.494 | 0.480 | 0.504 |
| A (314276)     | <i>LIN28B</i> | 6  | 61/252/293  | 0.309 | 0.416 | 0.427 | 0.568 |
| G (rs3020394)  | <i>ESR1</i>   | 6  | 49/268/309  | 0.292 | 0.428 | 0.414 | 0.440 |
| G (rs1884051)  | <i>ESR1</i>   | 6  | 49/266/312  | 0.290 | 0.424 | 0.412 | 0.498 |
| C (rs7753051)  | <i>IGF2R</i>  | 6  | 54/273/299  | 0.304 | 0.436 | 0.423 | 0.509 |
| C (rs1079866)  | <i>INHBA</i>  | 7  | 22/186/418  | 0.184 | 0.297 | 0.300 | 0.790 |
| T (rs2288696)  | <i>FGFR1</i>  | 8  | 24/186/416  | 0.187 | 0.297 | 0.304 | 0.598 |
| C (rs10980926) | <i>ZNF483</i> | 9  | 64/269/293  | 0.317 | 0.430 | 0.433 | 0.854 |
| C (rs10441737) | <i>ZNF483</i> | 9  | 66/267/277  | 0.327 | 0.438 | 0.440 | 0.927 |
| C (rs10769908) | <i>STK33</i>  | 11 | 137/289/191 | 0.456 | 0.468 | 0.496 | 0.168 |
| G (rs555621)   | <i>FSHB</i>   | 11 | 101/309/215 | 0.409 | 0.494 | 0.483 | 0.620 |
| A (rs11031010) | <i>FSHB</i>   | 11 | 11/126/484  | 0.119 | 0.203 | 0.210 | 0.442 |
| C (rs1782507)  | <i>FSHB</i>   | 11 | 69/298/258  | 0.349 | 0.477 | 0.454 | 0.252 |
| A (rs6589964)  | <i>BSX</i>    | 11 | 149/307/171 | 0.483 | 0.490 | 0.499 | 0.632 |
| A (rs1544410)  | <i>VDR</i>    | 12 | 79/294/251  | 0.362 | 0.471 | 0.462 | 0.665 |
| A (rs999460)   | <i>NKX2-1</i> | 14 | 56/284/286  | 0.316 | 0.454 | 0.433 | 0.267 |
| A (rs4986938)  | <i>ESR2</i>   | 14 | 73/298/255  | 0.355 | 0.476 | 0.458 | 0.338 |
| A (rs2241423)  | <i>MAP2K5</i> | 15 | 16/169/439  | 0.161 | 0.271 | 0.270 | 1.000 |
| T (rs12444979) | <i>GPRC5B</i> | 16 | 9/130/484   | 0.119 | 0.209 | 0.209 | 0.850 |
| A (rs9939609)  | <i>FTO</i>    | 16 | 111/300/214 | 0.418 | 0.480 | 0.486 | 0.743 |
| A (rs12324955) | <i>FTO</i>    | 16 | 58/243/325  | 0.287 | 0.388 | 0.409 | 0.204 |
| G (rs1398217)  | <i>SKOR2</i>  | 18 | 94/315/211  | 0.406 | 0.508 | 0.482 | 0.211 |
| G (rs2252673)  | <i>INSR</i>   | 19 | 27/200/399  | 0.203 | 0.320 | 0.323 | 0.805 |
| A (rs1073768)  | <i>GHRH</i>   | 20 | 140/304/184 | 0.465 | 0.484 | 0.498 | 0.521 |
| C (rs4633)     | <i>COMT</i>   | 22 | 140/296/190 | 0.460 | 0.473 | 0.497 | 0.228 |
| A (rs5930973)  | <i>CD40LG</i> | 23 | 1/75/549    | 0.062 | 0.120 | 0.116 | 0.502 |
| T (rs3092921)  | <i>CD40LG</i> | 23 | 1/95/532    | 0.077 | 0.151 | 0.143 | 0.163 |

*Note:* Chr – chromosome; H<sub>o</sub> – observed heterozygosity; H<sub>e</sub> – expected heterozygosity; A1 – minor allele; A2 – major allele; P – level of significance.
