# Supplementary material for: Maternal Age at Menarche Genes Determines Fetal Growth Restriction Risk
Source: MDPI journal article supplement (doi:10.3390/ijms25052647), 2024-02-24
Supplement: s1 [file s1]

**Supplementary Table S11.** The literature data about associations of the studied polymorphisms with age at menarche and some menarche-related traits.

| Chr | SNP        | Gene/Region   | Phenotype                                                                              | Association (significance)<br>(associated allele/genotype)                                                                                                                                                                        | Reference                    |
|-----|------------|---------------|----------------------------------------------------------------------------------------|-----------------------------------------------------------------------------------------------------------------------------------------------------------------------------------------------------------------------------------|------------------------------|
| 1   | rs1514175  | <i>TNNI3K</i> | Age at menarche<br><b>Body mass index</b><br><b>Body mass index</b><br>Body mass index | -12.2 d ( $p=4.0 \times 10^{-7}$ ) (A)<br><b>0.07 kg/m<sup>2</sup> (<math>p=8 \times 10^{-14}</math>) (A)</b><br><b>0.06 unit (<math>p=3 \times 10^{-11}</math>) (A)</b><br>0.20 kg/m <sup>2</sup> ( $p=7.7 \times 10^{-4}$ ) (A) | [41]<br>[44]<br>[83]<br>[84] |
| 1   | rs466639   | <i>RXRG</i>   | <b>Age at menarche</b><br>Body mass index<br>Age at menarche<br><b>Age at menarche</b> | <b>-4.2 w (<math>p=1 \times 10^{-13}</math>) (T)</b><br>increasing ( $p=0.011$ ) (T)<br>-4.1 w ( $p=0.023$ ) (T)<br><b>0.08 unit (<math>p=2 \times 10^{-24}</math>) (C)</b>                                                       | [34]<br>[34]<br>[85]<br>[35] |
| 1   | rs7538038  | <i>KISS1</i>  | Age at menarche                                                                        | -0.061 y ( $p_{\text{adj}}=0.012$ ) (G)                                                                                                                                                                                           | [53]                         |
| 2   | rs713586   | <i>RBJ</i>    | Age at menarche<br><b>Body mass index</b>                                              | 11.7 d ( $p=8.4 \times 10^{-7}$ ) (T)<br><b>0.14 kg/m<sup>2</sup> (<math>p=6 \times 10^{-22}</math>) (C)</b>                                                                                                                      | [41]<br>[44]                 |
| 2   | rs2164808  | <i>POMC</i>   | Age at menarche                                                                        | 0.046 y ( $p_{\text{adj}}=0.038$ ) (T)                                                                                                                                                                                            | [53]                         |
| 2   | rs7589318  | <i>POMC</i>   | Age at menarche                                                                        | 0.048 y ( $p_{\text{adj}}=0.047$ ) (A)                                                                                                                                                                                            | [53]                         |
| 2   | rs4374421  | <i>LHCGR</i>  | Age at menarche                                                                        | 0.060 y ( $p_{\text{adj}}=0.017$ ) (C)                                                                                                                                                                                            | [53]                         |
| 2   | rs7579411  | <i>LHCGR</i>  | Age at menarche                                                                        | 0.058 y ( $p_{\text{adj}}=0.013$ ) (T)                                                                                                                                                                                            | [53]                         |
| 2   | rs4953616  | <i>LHCGR</i>  | Age at menarche                                                                        | -0.065 y ( $p_{\text{adj}}=0.006$ ) (T)                                                                                                                                                                                           | [53]                         |
| 2   | rs6732220  | <i>FSHR</i>   | Age at menarche<br>Age at menarche                                                     | 0.17 y ( $p=0.0018, p_{\text{bonf}}>0.05$ ) (G) *<br>0.34 y ( $p=3 \times 10^{-5}$ ) epistasis                                                                                                                                    | [86]                         |
| 2   | rs4953655  | <i>FSHR</i>   | Age at menarche<br>Age at menarche                                                     | 0.17 y ( $p=0.0023, p_{\text{bonf}}>0.05$ ) (G) *<br>0.34 y ( $p=3 \times 10^{-5}$ ) epistasis                                                                                                                                    | [86]                         |
| 2   | rs12617311 | <i>PLCL1</i>  | <b>Age at menarche</b><br>Age at menarche                                              | <b>-3.0 w (<math>p=6 \times 10^{-13}</math>) (A)</b><br>-4.7 w ( $p=0.004$ ) (A)                                                                                                                                                  | [34]<br>[85]                 |
| 3   | rs6438424  | <i>IGSF11</i> | <b>Age at menarche</b><br>Height adult<br>Age at menarche<br>Age at menarche           | <b>-2.7 w (<math>p=1 \times 10^{-13}</math>) (A)</b><br>-0.013 Zscore ( $p=0.0004$ ) (A)<br>-3.7 w ( $p=0.008$ ) (A))<br>0.17 y ( $p_{\text{perm}}=0.005$ ) (A))                                                                  | [34]<br>[34]<br>[85]<br>[36] |
| 4   | rs2013573  | <i>UGT2B4</i> | Age at menarche                                                                        | 0.060 y ( $p_{\text{adj}}=0.019$ ) (C)                                                                                                                                                                                            | [53]                         |
| 4   | rs13111134 | <i>UGT2B4</i> | Age at menarche<br>Age at menarche                                                     | 0.055 y ( $p_{\text{adj}}=0.042$ ) (G)<br>0.431 y ( $p_{\text{bonf}}=0.044$ ) (A)                                                                                                                                                 | [53]<br>[42]                 |
| 4   | rs222003   | <i>GC</i>     | Plasma levels of 25(OH)D and                                                           | ( $p>0.05$ )                                                                                                                                                                                                                      | [87]                         |

|   |           |        |                                                                                                                                                                                                                                                                         |                                                                                                                                                                                                                                                                                                                                                                                                                                                                                                                                                                                               |                                                                                                                                    |
|---|-----------|--------|-------------------------------------------------------------------------------------------------------------------------------------------------------------------------------------------------------------------------------------------------------------------------|-----------------------------------------------------------------------------------------------------------------------------------------------------------------------------------------------------------------------------------------------------------------------------------------------------------------------------------------------------------------------------------------------------------------------------------------------------------------------------------------------------------------------------------------------------------------------------------------------|------------------------------------------------------------------------------------------------------------------------------------|
|   |           |        | 1,25(OH) <sub>2</sub> D<br>Compression strength index (male)                                                                                                                                                                                                            | (p>0.05)                                                                                                                                                                                                                                                                                                                                                                                                                                                                                                                                                                                      | [88]                                                                                                                               |
| 4 | rs222020  | GC     | Plasma 25(OH)D concentrations<br>Compression strength index (male)                                                                                                                                                                                                      | (p=0.004)<br>(p=0.0042)                                                                                                                                                                                                                                                                                                                                                                                                                                                                                                                                                                       | [89]<br>[88]                                                                                                                       |
|   |           |        | Adolescent idiopathic scoliosis                                                                                                                                                                                                                                         | (p<0.05)                                                                                                                                                                                                                                                                                                                                                                                                                                                                                                                                                                                      | [90]                                                                                                                               |
| 4 | rs3756261 | EGF    | Birth weight                                                                                                                                                                                                                                                            | lower (p<0.0001) (A)<br>(4 snps haplotype)                                                                                                                                                                                                                                                                                                                                                                                                                                                                                                                                                    | [91]                                                                                                                               |
| 5 | rs757647  | KDM3B  | Age at menarche<br>Age at menarche                                                                                                                                                                                                                                      | <b>-2.4w(p=5.4x10<sup>-8</sup>,p<sub>bonf</sub>&gt;0.05)(A)*</b><br>-4.2 w (p=0.003) (A)                                                                                                                                                                                                                                                                                                                                                                                                                                                                                                      | <b>[34]</b><br>[85]                                                                                                                |
| 6 | rs7766109 | F13A1  | Body mass index,<br>pressure insulin response,<br>triglycerides,<br>high density lipoprotein cholesterol in<br>PCOS                                                                                                                                                     | (p=0.013)<br>(p=0.015)<br>(p=0.001)<br>(p=0.012)                                                                                                                                                                                                                                                                                                                                                                                                                                                                                                                                              | [92]                                                                                                                               |
| 6 | rs4946651 | LIN28B | Age at menarche                                                                                                                                                                                                                                                         | <b>0.085 y (p= 3 x10<sup>-8</sup>) (A)</b>                                                                                                                                                                                                                                                                                                                                                                                                                                                                                                                                                    | [93]                                                                                                                               |
| 6 | rs7759938 | LIN28B | Age at menarche<br>Age at menarche<br>Height adult<br>Age at menarche<br>Height<br>Late pubertal growth<br>Age at menarche<br>Tanner stage<br>Tanner stage (boys)<br>Tanner stage (girls)<br>Height adult<br>Height adult<br>Pubertal growth<br>Age at menarche in PCOS | <b>0.09 y (p= 7 x10<sup>-9</sup>) (C)</b><br><b>6.4 w (p= 5 x10<sup>-60</sup>) (C)</b><br>-0.042 Zscore (p=8.7 x10 <sup>-18</sup> ) (T)<br>8.3 w (p= 4 x10 <sup>-6</sup> ) (C)<br><b>-0.045 unit (p= 8 x10<sup>-31</sup>) (T)</b><br><b>0.11 unit (p= 4 x10<sup>-9</sup>) (C)</b><br><b>0.12 unit (p= 8 x10<sup>-110</sup>) (C)</b><br>-0.080 (p=3.42 x10 <sup>-8</sup> ) (C)<br>-0.063 (p=0.012) (C)<br>-0.088 (p=5.57 x10 <sup>-7</sup> ) (C)<br>increasing (p=8.69 x10 <sup>-18</sup> ) (C)<br>0.042 cm (p= 2 x10 <sup>-6</sup> ) (C)<br>(p=5x10 <sup>-11</sup> )<br>earlier (p=0.006) (T) | [94]<br><b>[34]</b><br>[34]<br>[85]<br>[95]<br>[96]<br><b>[35]</b><br>[35]<br>[35]<br>[35]<br>[35]<br>[35]<br>[97]<br>[98]<br>[99] |
| 6 | rs314280  | LIN28B | Age at menarche<br>Age at menarche<br>Age at menarche (EA)                                                                                                                                                                                                              | <b>0.086 y (p= 2 x10<sup>-8</sup>) (T)</b><br><b>1.2 m (p=2 x10<sup>-14</sup>) (T)</b><br>0.08 y (p=2 x10 <sup>-8</sup> ) (T)                                                                                                                                                                                                                                                                                                                                                                                                                                                                 | [93]<br>[100]                                                                                                                      |

|   |            |               |                                                                                                                                                                         |                                                                                                                                                                                                                              |                                                                     |
|---|------------|---------------|-------------------------------------------------------------------------------------------------------------------------------------------------------------------------|------------------------------------------------------------------------------------------------------------------------------------------------------------------------------------------------------------------------------|---------------------------------------------------------------------|
|   |            |               | Age at menarche (Asians)                                                                                                                                                | 0.13 y (p=0.0012) (T)                                                                                                                                                                                                        | [101]<br>[101]                                                      |
| 6 | rs314276   | <i>LIN28B</i> | <b>Age at menarche</b><br>Height<br>Breast development in girls<br>Voice breaking<br>Height growth in girls<br><b>Puberty onset</b>                                     | <b>- 0.14 y (p= 4 x10<sup>-16</sup>) (C)</b><br>-0.37 cm (p=3.6 x10 <sup>-7</sup> ) (C)<br>earlier (p = 0.001)<br>earlier (p = 0.006)<br>faster tempo (p= 0.00008)<br><b>0.08 unit (p= 2 x10<sup>-8</sup>) (C)</b>           | <b>[66]</b><br>[66]<br><br><br><br><br><b>[70]</b>                  |
| 6 | rs3020394  | <i>ESR1</i>   | Age at menarche<br>Hip fractures                                                                                                                                        | -0.12 y (p=0.0081, p <sub>bonf</sub> >0.05)(A)*<br>OR=1.66 (p=0.0004)                                                                                                                                                        | [86]<br>[102]                                                       |
| 6 | rs1884051  | <i>ESR1</i>   | Age at menarche<br>Hip fractures<br>Body weight,<br>body mass index ,<br>waist-hip ratio,<br>fat body mass,<br>body fat percentage<br>obesity in men<br>Type 2 diabetes | -0.13 y (p=0.0035, p <sub>bonf</sub> >0.05)(A)*<br>OR=1.46 (p=0.0004)<br>lower (p = 0.007) (A),<br>(p = 0.003) (A) ,<br>(p= 0.011) (A) ,<br>(p= 0.010) (A),<br>(p= 0.040) (A),<br>decreased (p=0.04) (A)<br>(p=0.011)        | [86]<br>[102]<br>[103]<br><br><br><br><br>[104]                     |
| 6 | rs7753051  | <i>IGF2R</i>  | Age at menarche<br>Age at menarche<br>Age at menarche                                                                                                                   | 0.14 y (p=0.001, p <sub>bonf</sub> >0.05) (T) *<br>0.34 y (p= 3 x10 <sup>-5</sup> ) epistasis<br>0.500 y (p=0.046, p <sub>bonf</sub> >0.05)(A)*                                                                              | [86]<br>[86]<br>[42]                                                |
| 7 | rs1079866  | <i>INHBA</i>  | <b>Age at menarche</b><br>Height adult<br><b>Age at menarche</b><br>Tanner stage<br>Tanner stage (girls)<br>Height adult<br>Age at menarche                             | <b>3.9 w (p=6 x10<sup>-14</sup>) (G)</b><br>-0.016 Zscore (p=0.015) (C)<br><b>0.07 unit (p=9 x10<sup>-24</sup>) (G )</b><br>-0.054 (p=0.005) (G)<br>-0.058 (p=0.015) (G)<br>increasing (p=0.015) (G)<br>0.13 y (p=0.037) (G) | <b>[34]</b><br>[34]<br><b>[35]</b><br>[35]<br>[35]<br>[35]<br>[105] |
| 8 | rs2288696  | <i>FGFR1</i>  | Age at menarche                                                                                                                                                         | -0.058 y (p <sub>adj</sub> =0.033) (G)                                                                                                                                                                                       | [53]                                                                |
| 9 | rs10980926 | <i>ZNF483</i> | <b>Age at menarche</b>                                                                                                                                                  | <b>2.5 w (p= 4 x10<sup>-11</sup>) ( A)</b>                                                                                                                                                                                   | <b>[34]</b>                                                         |

|    |            |               |                                                                                                                                                                                                                                                                                                                                                                                                          |                                                                                                                                                                            |                                                                            |
|----|------------|---------------|----------------------------------------------------------------------------------------------------------------------------------------------------------------------------------------------------------------------------------------------------------------------------------------------------------------------------------------------------------------------------------------------------------|----------------------------------------------------------------------------------------------------------------------------------------------------------------------------|----------------------------------------------------------------------------|
|    |            |               | Height adult<br>Age at menarche                                                                                                                                                                                                                                                                                                                                                                          | -0.015 Zscore (p=0.0017) (G)<br>2.6 w (p= 0.047) ( A)                                                                                                                      | [34]<br>[85]                                                               |
| 9  | rs10441737 | <i>ZNF483</i> | <b>Age at menarche (EA)</b>                                                                                                                                                                                                                                                                                                                                                                              | <b>-2.78 unit (p= 4 x10<sup>-15</sup>) (T)</b>                                                                                                                             | [106]                                                                      |
| 11 | rs10769908 | <i>STK33</i>  | Age at menarche                                                                                                                                                                                                                                                                                                                                                                                          | 9.6 d (p=7.8× 10 <sup>-5</sup> ) (T)                                                                                                                                       | [41]                                                                       |
| 11 | rs555621   | <i>FSHB</i>   | Age at menarche                                                                                                                                                                                                                                                                                                                                                                                          | 0.059 y (p <sub>adj</sub> =0.0011) (C)                                                                                                                                     | [53]                                                                       |
| 11 | rs11031010 | <i>FSHB</i>   | Age at menarche<br>PCOS                                                                                                                                                                                                                                                                                                                                                                                  | 0.079 y (p <sub>adj</sub> =0.0037) (A)<br>(p=4.27 × 10 <sup>-8</sup> )                                                                                                     | [53]<br>[107]                                                              |
| 11 | rs1782507  | <i>FSHB</i>   | Age at menarche                                                                                                                                                                                                                                                                                                                                                                                          | 0.046 y (p <sub>adj</sub> =0.021) (T)                                                                                                                                      | [53]                                                                       |
| 11 | rs6589964  | <i>BSX</i>    | <b>Age at menarche</b><br>Height adult                                                                                                                                                                                                                                                                                                                                                                   | <b>-2.7 w (p= 2 x10<sup>-12</sup>) (A)</b><br>-0.014 Zscore (p=0.0025) (A)                                                                                                 | <b>[34]</b><br>[34]                                                        |
| 12 | rs1544410  | <i>VDR</i>    | Vitamin D deficiency in children<br>Vitamin D vs testosterone level, free<br>androgen index in women<br>23% of the variation in serum 25-<br>hydroxyvitamin D concentrations in<br>children<br>Testosterone level and free androgen<br>index in women<br>Osteoporosis<br>Bone mineral density at the lumbar<br>spine in girls with adolescent idiopathic<br>scoliosis<br>Adolescent idiopathic scoliosis | OR=2.33 (p=0.041) (G)<br>(p<0.05)<br><br>(p<0.05)<br><br>p<0.002<br><br>OR=0.61-0.70 (p<0.05)<br>lower levels (p<0.05) (TT)<br><br>(p<0.05)                                | [108]<br>[109]<br><br>[110]<br><br><br>[109]<br>[111]<br>[112]<br><br>[90] |
| 14 | rs999460   | <i>NKX2-1</i> | Age at menarche                                                                                                                                                                                                                                                                                                                                                                                          | 0.046 y (p <sub>adj</sub> =0.039) (A)                                                                                                                                      | [53]                                                                       |
| 14 | rs4986938  | <i>ESR2</i>   | Age at menarche                                                                                                                                                                                                                                                                                                                                                                                          | -7.0 m (p=0.005) (G)                                                                                                                                                       | [113]                                                                      |
| 15 | rs2241423  | <i>MAP2K5</i> | Age at menarche<br><b>Body mass index</b><br>Obesity<br>Body mass index<br>Children obesity                                                                                                                                                                                                                                                                                                              | 13.1 d (p=6.1× 10 <sup>-6</sup> ) (A)<br><b>0.13 kg/m<sup>2</sup> (p= 1 x10<sup>-18</sup>) (G)</b><br>OR = 0.79 (p= 0.029) (A)<br>-0.092 unit (p = 0.028) (A)<br>(p<0.005) | [41]<br><b>[44]</b><br>[114]<br>[114]                                      |

|    |            |               |                                                                                                                                                                                                   |                                                                                                                                                                                                                                                                                                                                                                                                                                                      |                                                                                                      |
|----|------------|---------------|---------------------------------------------------------------------------------------------------------------------------------------------------------------------------------------------------|------------------------------------------------------------------------------------------------------------------------------------------------------------------------------------------------------------------------------------------------------------------------------------------------------------------------------------------------------------------------------------------------------------------------------------------------------|------------------------------------------------------------------------------------------------------|
|    |            |               | Obesity<br>Adulthood body mass index<br>Body mass index                                                                                                                                           | OR=1.34 (0.001) (G)<br>(p<0.05)<br>0.11 kg/m <sup>2</sup> (p=0.028) (G)                                                                                                                                                                                                                                                                                                                                                                              | [115]<br>[90]<br>[116]<br>[84]                                                                       |
| 16 | rs12444979 | <i>GPRC5B</i> | Age at menarche<br><b>Body mass index</b><br>Body mass index<br>Body mass index (EA)<br>Body fat mass (EA)                                                                                        | 13.5 d (p=2.6× 10 <sup>-4</sup> ) (T)<br><b>0.17 kg/m<sup>2</sup> (p=3 ×10<sup>-21</sup>) (C)</b><br>(p<0.05)<br>(p=0.014)<br>(p=0.002)                                                                                                                                                                                                                                                                                                              | [41]<br><b>[44]</b><br>[46]<br>[45]<br>[45]                                                          |
| 16 | rs9939609  | <i>FTO</i>    | <b>Age at menarche</b><br>Body mass index<br><b>Body mass index</b><br><b>Body mass index</b><br><b>Obesity</b><br>Obesity<br>Obesity<br>Obesity<br>Obesity<br>Body mass index<br>Extreme obesity | <b>-2.1 w (p= 3 ×10<sup>-8</sup>) (A)</b><br>increasing (p= 6.3 ×10 <sup>-17</sup> ) (A)<br><b>0.33 kg/m<sup>2</sup> (p= 4 ×10<sup>-51</sup>) (A)</b><br><b>0.36 kg/m<sup>2</sup> (p= 3 ×10<sup>-35</sup>) (A)</b><br><b>OR=1.25 (p= 1 ×10<sup>-20</sup>) (A)</b><br>OR=9.86 (p=0.026) (AA)<br>OR=2.03 (p=0.002) (AA)<br>OR=1.72 (p=0.009) (AA)<br>OR = 1.39 (p < 0.01) (A)<br>increasing (p=0.0059) (A)<br>OR=1.46 (p=1.42 ×10 <sup>-11</sup> ) (A) | <b>[34]</b><br>[34]<br>[117]<br>[118]<br>[119]<br>[120]<br>[121]<br>[122]<br>[123]<br>[124]<br>[125] |
| 16 | rs12324955 | <i>FTO</i>    | Age at menarche                                                                                                                                                                                   | -0.15 y (p=0.0057, p <sub>bonf</sub> >0.05)(A)*                                                                                                                                                                                                                                                                                                                                                                                                      | [86]                                                                                                 |
| 18 | rs1398217  | <i>SKOR2</i>  | <b>Age at menarche</b>                                                                                                                                                                            | <b>-2.7 w (p= 2 ×10<sup>-13</sup>) (G)</b>                                                                                                                                                                                                                                                                                                                                                                                                           | <b>[34]</b>                                                                                          |
| 19 | rs2252673  | <i>INSR</i>   | PCOS<br>PCOS                                                                                                                                                                                      | OR=1.32 (p=0.006) (G)<br>(p<0.05)                                                                                                                                                                                                                                                                                                                                                                                                                    | [126]<br>[127]                                                                                       |
| 20 | rs1073768  | <i>GHRH</i>   | Age at menarche                                                                                                                                                                                   | -0.046 y (p <sub>adj</sub> =0.045) (C)                                                                                                                                                                                                                                                                                                                                                                                                               | [53]                                                                                                 |
| 22 | rs4633     | <i>COMT</i>   | Age at menarche                                                                                                                                                                                   | 0.13 y (p=0.0097, p <sub>bonf</sub> >0.05) (T) *                                                                                                                                                                                                                                                                                                                                                                                                     | [86]                                                                                                 |
| X  | rs5930973  | <i>CD40LG</i> | Age at menarche                                                                                                                                                                                   | 0.101 y (p <sub>adj</sub> =0.0067) (A)                                                                                                                                                                                                                                                                                                                                                                                                               | [53]                                                                                                 |

|   |           |               |                 |                                        |      |
|---|-----------|---------------|-----------------|----------------------------------------|------|
| X | rs3092921 | <i>CD40LG</i> | Age at menarche | 0.074 y ( $p_{\text{adj}}=0.037$ ) (C) | [53] |
|---|-----------|---------------|-----------------|----------------------------------------|------|

*Note:* The data from the GWAS are highlighted in bold.

\* putative candidate loci age at menarche (crude  $p < 0.05$ , corrected for multiple comparisons  $p_{\text{bonf}} > 0.05$ ).
